# Supplementary material
Source: PubMed Central journal article supplement (PMC5821068)
Supplement: NIHMS465329-supplement-Suppl.pdf [file NIHMS465329-supplement-Suppl.pdf]

## Emotional Response Inhibition in Bipolar Disorder: A Functional Magnetic Resonance Imaging Study of Trait- and State-Related Abnormalities

### Supplemental Information

**Table S1.** Clinical and demographic information by group.

| Measure                                          | BD (n = 30)<br>Mean (SD) | BE (n = 14)<br>Mean (SD) | BM (n = 30)<br>Mean (SD) | HC (n = 30)<br>Mean (SD) | ANOVA    |
|--------------------------------------------------|--------------------------|--------------------------|--------------------------|--------------------------|----------|
| Age (years)                                      | M=35 (11)                | M=31 (11)                | M=34 (11)                | M=32 (10)                | ns       |
| Age at first episode (years)                     | M=14 (6)                 | M=15 (5)                 | M=14 (5)                 |                          | ns       |
| Hamilton Depression Rating Scale score (17 item) | M=20 (4)                 | M= 7 (4)                 | M=6 (3)                  |                          | 0.001    |
| Young Mania Rating Scale score                   | M=3 (3)                  | M=2 (3)                  | M=16 (3)                 |                          | 0.001    |
|                                                  | Median (Range)           | Median (Range)           | Median (Range)           |                          | ANOVA    |
| Period off medication prior to scan (months)     | 12 (1-108)               | 22 (2-384)               | 30 (1-360)               |                          | ns       |
| Number of prior mood episodes (depression)       | 15 (2-186)               | 20 (0-100)               | 15 (2-102)               |                          | ns       |
| Number of prior mood episodes (mania)            | 24 (1-310)               | 32 (1-122)               | 75 (3-447)               |                          | ns       |
| Time since last manic episode (months)           | 4 (1-36)                 | 2 (1-384)                | 3 (1-60)                 |                          | ns       |
| Time since last depressive episode (months)      | 6 (1-26)                 | 3 (1-19)                 | 3 (.25-108)              |                          | ns       |
| Duration of current episode (weeks)              | 4 (1.4-32)               | 4 (2-1536)               | 1 (1-8)                  |                          | ns       |
|                                                  | n (%)                    | n (%)                    | n (%)                    | n (%)                    | $\chi^2$ |
| Female                                           | 18 (60%)                 | 10 (71%)                 | 19 (63%)                 | 19 (63)                  | ns       |
| Caucasian                                        | 26 (87%)                 | 12 (86%)                 | 28 (93%)                 | 27 (90)                  | ns       |
| Trauma history                                   | 15 (50%)                 | 9 (64%)                  | 15 (50%)                 |                          | ns       |
| History of suicide attempt                       | 13 (43%)                 | 6 (43%)                  | 15 (50%)                 |                          | ns       |
| History of psychosis                             | 11 (37%)                 | 4 (27%)                  | 7(23%)                   |                          | ns       |
| Bipolar I                                        | 13 (43%)                 | 10 (71%)                 | 17 (57%)                 |                          | ns       |
| Bipolar II                                       | 17 (57%)                 | 4 (29%)                  | 13 (43%)                 |                          | ns       |
| Hypomanic:Manic                                  |                          |                          | 27:3                     |                          |          |
| History of alcohol abuse                         | 16 (53%)                 | 5 (36%)                  | 12 (40%)                 |                          | ns       |
| History of drug abuse                            | 14 (47%)                 | 7 (50%)                  | 15 (50%)                 |                          | ns       |

ANOVA, analysis of variance; BD, bipolar depression; BE, bipolar euthymia; BM, bipolar mania; HC, healthy control; M, mean; ns, not significant.

**Table S2.** Behavioral performance.

|                            | <b>BD</b>    | <b>BE</b>    | <b>BM</b>    | <b>HC</b>    | <b>F</b> | <b>p</b> |
|----------------------------|--------------|--------------|--------------|--------------|----------|----------|
| <b>Letters</b>             |              |              |              |              |          |          |
| <i>Accuracy</i>            |              |              |              |              |          |          |
| Letter Go block            | 99% (2%)     | 99% (2%)     | 99% (3%)     | 100% (1%)    | 1.11     | 0.35     |
| Letter No-Go: Go trials    | 99% (2%)     | 100% (0%)    | 98% (9%)     | 100% (0%)    | 1.46     | 0.23     |
| Letter No-Go: No-Go trials | 91% (10%)    | 89% (12%)    | 85% (22%)    | 95% (7%)     | 2.33     | 0.08     |
| <i>Reaction Time</i>       |              |              |              |              |          |          |
| Letter Go block            | 325.7 (51.6) | 298.2 (55.5) | 297.2 (52.0) | 336.2 (67.9) | 3.03     | 0.03     |
| Letter No-Go: Go trials    | 402.5 (40.4) | 410.9 (41.7) | 397.9 (57.2) | 401.9 (54.1) | 0.22     | 0.88     |
| <b>Happy Faces</b>         |              |              |              |              |          |          |
| <i>Accuracy</i>            |              |              |              |              |          |          |
| Happy Go block             | 98% (3%)     | 100% (0%)    | 98% (5%)     | 100% (0%)    | 2.73     | 0.05     |
| Sad No-Go: Go trials       | 94% (11%)    | 99% (3%)     | 92% (15%)    | 94% (11%)    | 1.11     | 0.35     |
| Happy No-Go: No-Go trials  | 92% (15%)    | 95% (9%)     | 89% (22%)    | 94% (11%)    | 0.79     | 0.50     |
| <i>Reaction Time</i>       |              |              |              |              |          |          |
| Happy Go block             | 330.8 (52.5) | 299.2 (51.0) | 303.6 (58.6) | 338.2 (62.5) | 2.80     | 0.04     |
| Sad No-Go: Go trials       | 481.6 (72.3) | 479.8 (57.4) | 486.7 (78.5) | 474.4 (65.8) | 0.15     | 0.93     |
| <b>Sad Faces</b>           |              |              |              |              |          |          |
| <i>Accuracy</i>            |              |              |              |              |          |          |
| Sad Go block               | 98% (6%)     | 99% (2%)     | 99% (3%)     | 99% (2%)     | 0.18     | 0.91     |
| Happy No-Go: Go trials     | 99% (2%)     | 98% (5%)     | 98% (8%)     | 99% (3%)     | 0.70     | 0.55     |
| Sad No-Go: No-Go trials    | 91% (12%)    | 88% (11%)    | 90% (19%)    | 96% (6%)     | 1.66     | 0.18     |
| <i>Reaction Time</i>       |              |              |              |              |          |          |
| Sad Go block               | 350.2 (57.4) | 324.7 (50.9) | 340.4 (63.8) | 356.6 (69.7) | 0.96     | 0.42     |
| Happy No-Go: Go trials     | 459.9 (56.0) | 465.8 (52.7) | 456.5 (65.4) | 452.8 (50.3) | 0.19     | 0.90     |

BD, bipolar depression; BE, bipolar euthymia; BM, bipolar mania; HC, healthy control.

Mean (standard deviation) accuracy and reaction time for each stimulus type. Performance measures are split into the different blocks in which they occur. Happy faces, for instance, were seen during Happy Go blocks (press button to faces, which were all happy), Sad No-Go blocks (press for happy faces, inhibit to sad faces) and Happy No-Go blocks (press for sad faces, inhibit to happy faces).

**Table S3.** Bipolar state effects during responses (Go blocks) to happy faces, sad faces or letters.

| Region                   | Main Effects |                |      |         | Post-Hoc Significant Comparisons* |                 |             |
|--------------------------|--------------|----------------|------|---------|-----------------------------------|-----------------|-------------|
|                          | BA           | MNI Peak       | Z    | Cluster | BE vs HC                          | BD              | BM          |
| <b>Happy Go</b>          |              |                |      |         |                                   |                 |             |
| None                     |              |                |      |         |                                   |                 |             |
| <b>Sad Go</b>            |              |                |      |         |                                   |                 |             |
| Ant Cing Cortex          | 10/24        | (-2, 56, 0)    | 3.38 | 244     |                                   | BD > BM         |             |
| R Inf Frontal Gyrus      | 44/45        | (50, 36, -6)   | 3.85 | 212     |                                   | BD > BE, BM, HC |             |
| Mid Cing Cortex          | 31           | (-14, -30, 46) | 3.05 | 33      | HC > BE                           | BD > BE         |             |
| Post Cing Cortex         | 23/31        | (8, -52, 28)   | 3.87 | 606     |                                   |                 | BM < BD, BE |
| L Sup Temp Gyrus         | 39           | (-46, -60, 26) | 4.09 | 370     |                                   |                 | BM < BD, BE |
| <b>Letter Inhibition</b> |              |                |      |         |                                   |                 |             |
| L Caudate                |              | (-12, 4, 20)   | 3.20 | 19      | BE > HC                           |                 | BM < BE     |

Clusters of significant activity represented, with voxel of peak activation (with peak z-score) in MNI coordinates.

Ant, anterior; BA, Brodmann's area; BD, bipolar depression; BE, bipolar euthymia; BM, bipolar mania; Cing, cingulate; HC, healthy control; Inf, inferior; L, left; Mid, middle; MNI, Montreal Neurological Institute; Post, posterior; R, right; Sup, superior; Temp, temporal.

\*Post-hoc comparisons were performed on mean activity within significant main effect clusters, with a Tukey honestly significant difference correction for  $p < .05$ , in order to clarify the nature of group differences.
